# Supplementary material for: Age-dependent SMN expression in disease-relevant tissue and implications for SMA treatment
Source: JCI journal article supplement (doi:10.1172/jci124120), 2019-10-06
Supplement: sd1 [file 1]

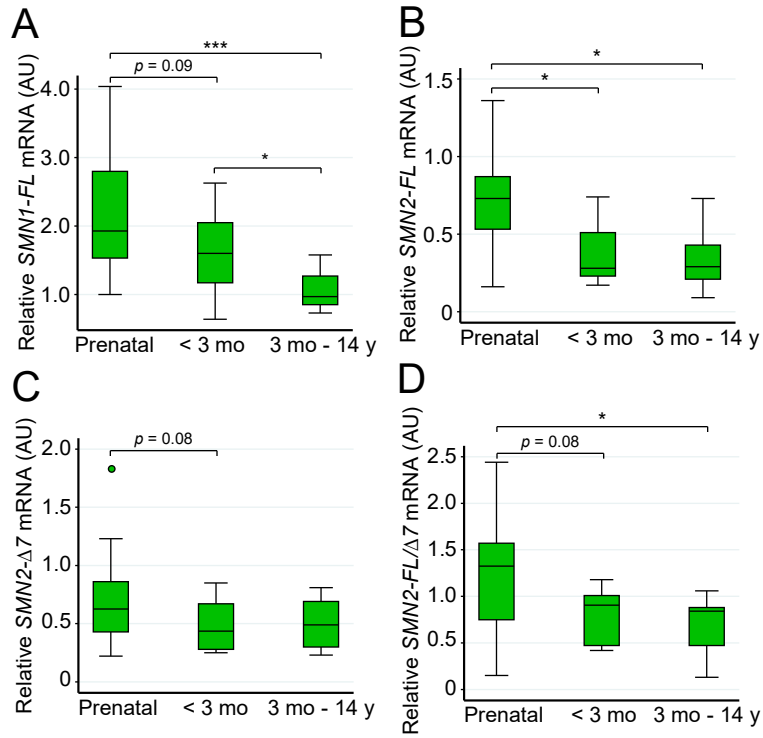

**Supplemental Figure S1:** SMN mRNA levels in human cortex at different ages. **(A-D)** **(A)** Full-length *SMN1* (*SMN1-FL*) mRNA, **(B)** full-length *SMN2* (*SMN2-FL*) mRNA, **(C)** truncated *SMN2-Δ7* mRNA, and **(D)** the ratio of *SMN2-FL/Δ7* mRNA. Data presented as medians, interquartile range (box), and 95% percentiles (whiskers). \*  $p < 0.05$ , \*\*\*  $p < 0.001$  and represent statistics before multiple comparisons ( $n=44$  control).  $P$ -values of pairwise comparison of medians were calculated using a Wilcoxon Rank-sum test. Adjustment for multiple comparisons was applied to control groups between time points.  $\alpha$  level was set to 0.0167 (0.05/3) using Bonferroni adjustment.

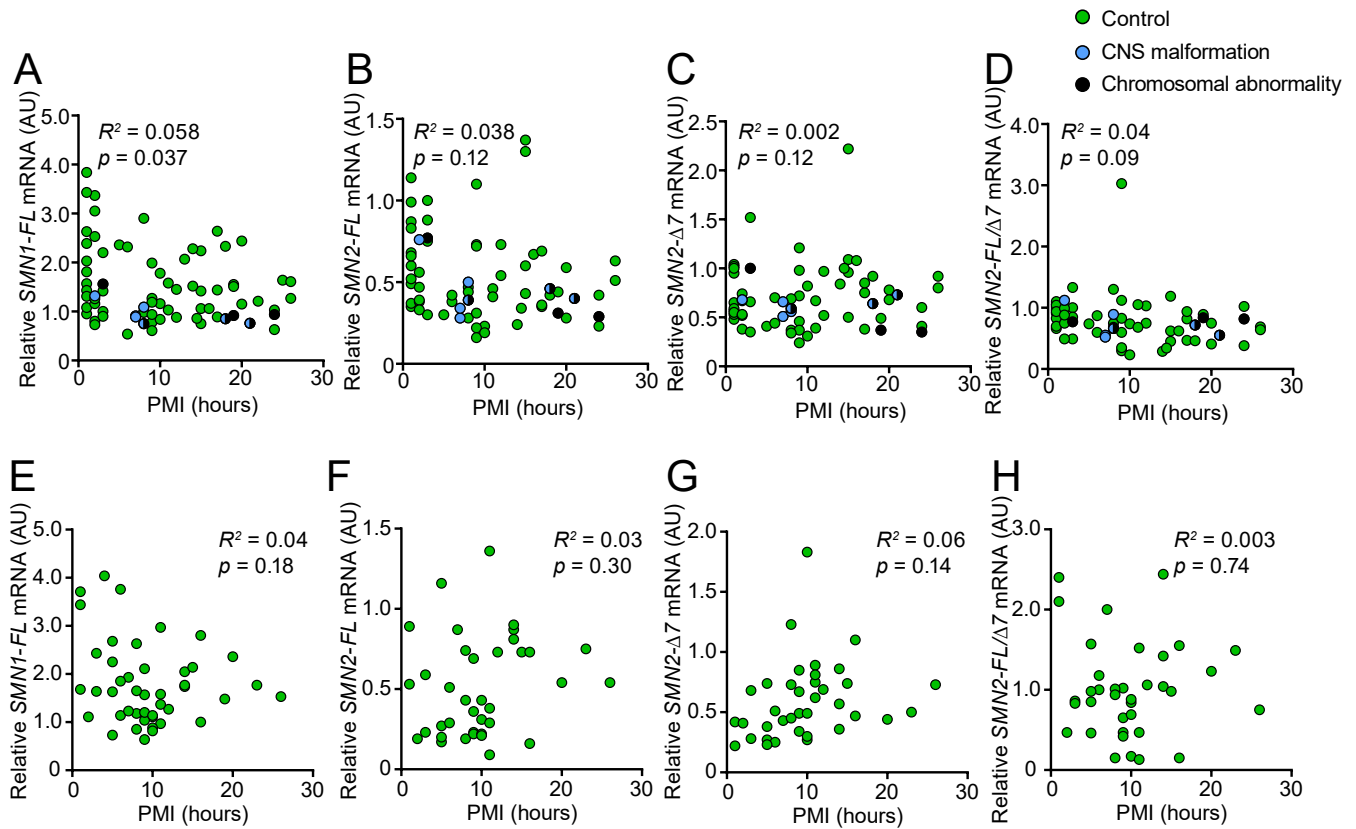

**Supplemental Figure S2:** PMI does not correlate with SMN transcript levels in human spinal cord or cortex. **(A-D)** Correlation between PMI and **(A)** full-length *SMN1* (*SMN1-FL*) mRNA, **(B)** full-length *SMN2* (*SMN2-FL*) mRNA, **(C)** truncated *SMN2* (*SMN2-Δ7*) mRNA, and **(D)** the ratio of *SMN2-FL/Δ7* mRNA in control spinal cord (n=75). **(E-H)** Correlation between PMI and **(E)** *SMN1-FL*, **(F)** *SMN2-FL*, **(G)** *SMN2-Δ7*, and **(H)** *SMN2-FL/Δ7* in control cortex (n=44). Linear regression analysis was performed to achieve  $R^2$  and  $p$ -values.

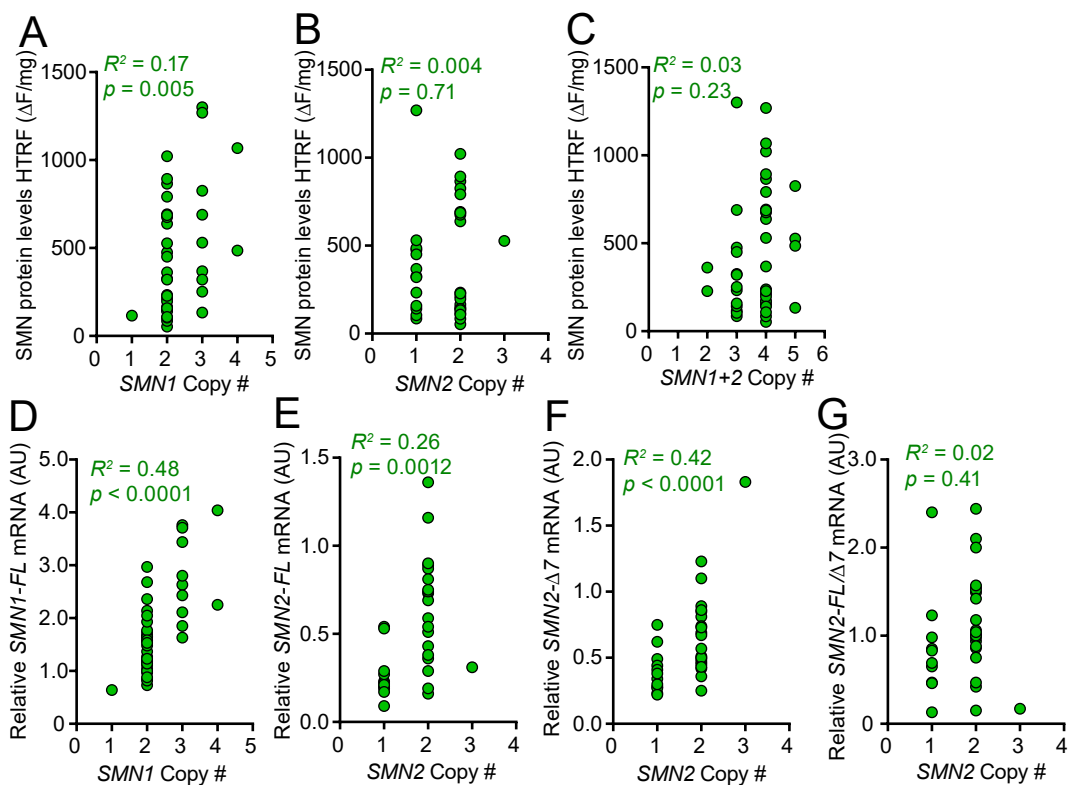

**Supplemental Figure S3:** *SMN1* and *SMN2* copy number correlate poorly with SMN protein expression in control cortex. **(A-C)** Correlation between SMN protein levels in control cortex ( $n=44$ ) measured by HTRF and **(A)** *SMN1* copy number, **(B)** *SMN2* copy number, or **(C)** the sum of *SMN1*+*SMN2* copy number. **(D)** *SMN1* copy number correlation with *SMN1-FL* mRNA. **(E-G)** *SMN2* copy # correlation with **(E)** *SMN2-FL*, **(F)** *SMN2- $\Delta 7$* , or **(G)** ratio of *SMN2-FL*/ $\Delta 7$  mRNA. Linear regression analysis was performed to achieve  $R^2$  and  $p$ -values.

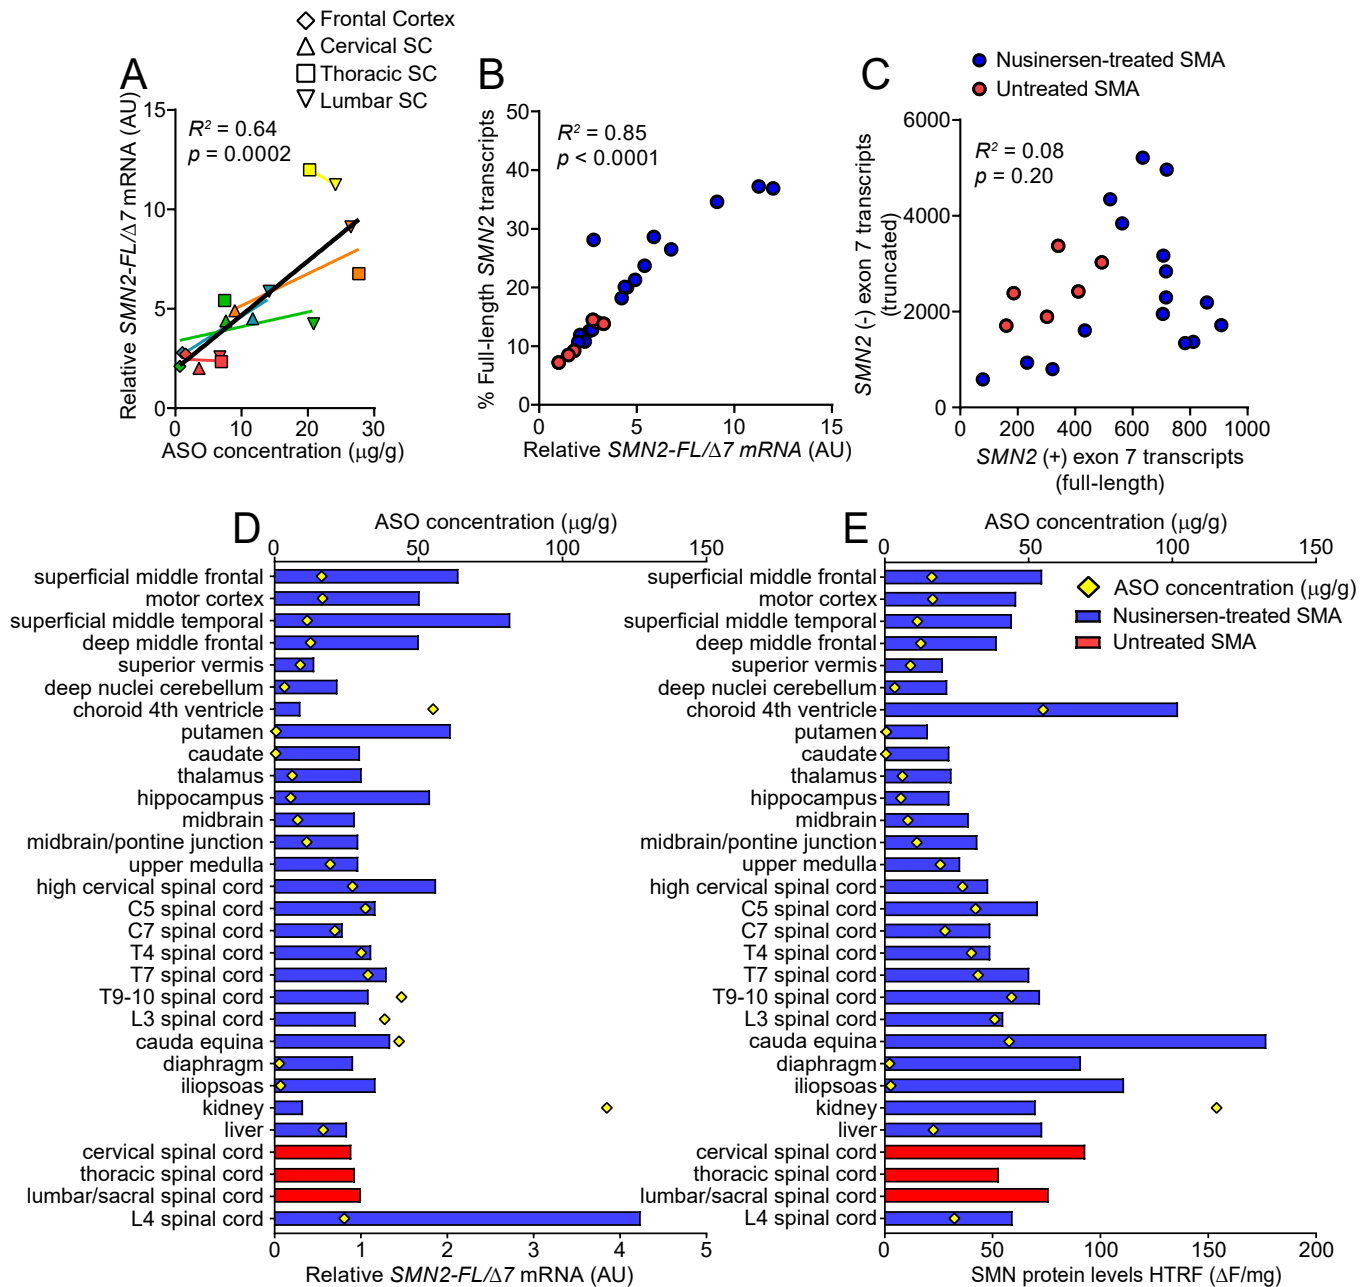

**Supplemental Figure S4:** (A) ASO concentration correlates with *SMN2-FL/Δ7* mRNA ratio in nusinersen-treated SMA patients. Shapes indicate tissue type. Different colors depict individual cases. Colored lines indicate line of best fit for each treated SMA patient. Black line indicates line of best fit for all tissues combined. (B-C) Correlations between relative and absolute *SMN2* mRNA measurements in nusinersen-treated ( $n=16$  tissues from 5 patients) and untreated ( $n=6$  tissues from 2 patients) SMA patients. (B) Scatter plot of relative *SMN2-FL/Δ7* mRNA against percentage of absolute *SMN2* transcript levels including exon 7. (C) Scatter plot of absolute *SMN2* transcripts including exon 7 (*SMN2* (+) exon 7) against absolute *SMN2* transcripts excluding exon 7 (*SMN2* (-) exon 7). Linear regression analysis was performed to achieve  $R^2$  and  $p$ -values. (D-E) Single case with poor final injection (D) *SMN2-FL/Δ7* and (E) SMN protein expression in in multiple tissues. Untreated SMA controls in red. L4 spinal cord of a treated SMA case with robust *SMN2-FL/Δ7* induction at bottom of each graph. ASO concentration in each tissue indicated with a yellow diamond.



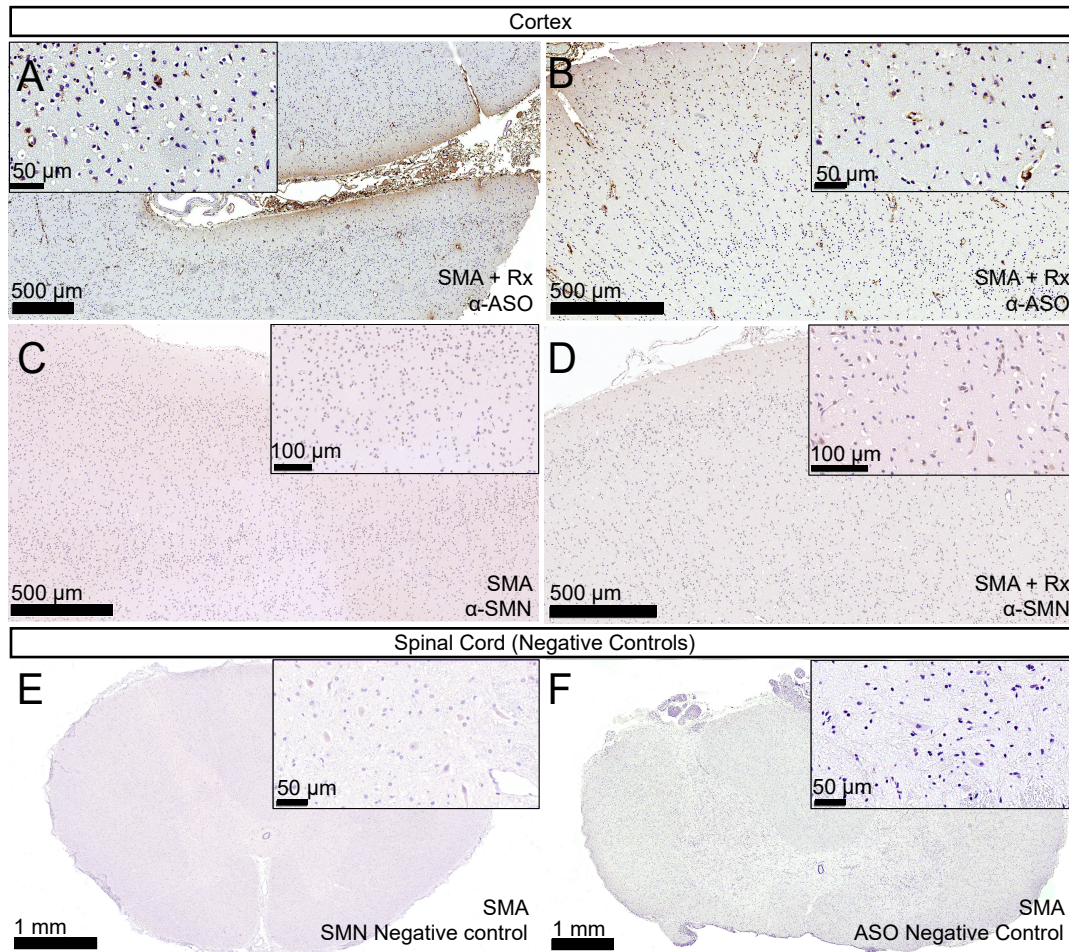

**Supplemental Figure S5:** ASO and SMN IHC in nusinersen-treated patient cortex and spinal cord. **(A-B)** Representative immunostaining for ASO in **(A)** frontal, and **(B)** temporal cortex of 2 nusinersen-treated cases. **(C-D)** Representative immunostaining for SMN in cortex of **(C)** untreated, or **(D)** nusinersen-treated SMA patients. **(E-F)** Negative controls for **(E)** SMN and **(F)** ASO in spinal cord. High power images in insets. Scale bars indicated on each image.

### *SMN1 and SMN2 gene copy number analysis*

DNA was extracted using the Blood & Tissue kit (Qiagen) using the manufacturer's protocol, including optional RNase-A step. Semi-quantitative PCR was performed to determine *SMN1* and *SMN2* gene copy numbers using 100 ng of template. The PCR reaction includes two internal standards (IS) with internal deletions that are amplified with the same primer set as the genomic counterpart, but can be distinguished by size and are used to monitor the efficiency of the reaction at the tube level (61). An amplicon of the cystic fibrosis gene *CFTR* is used in the competitive reaction as a standard for calculating the ratio of *SMN* (1 or 2) amplification compared to *CFTR* amplification. Restriction digestion with *DraI* differentiated between *SMN1* and *SMN2*, utilizing the C>T variation, c.840C>T. The digestion products were subjected to capillary electrophoresis and analyzed with GeneMarker software (Softgenetics). The ratio is calculated by using the areas of the gene-specific peaks. Copy numbers were assigned by dividing the ratio of *SMN* to *CFTR* amplification by the  $\gamma$  value determined from the linearity of control samples. All samples are amplified in replicate. Amplification was performed in a 25  $\mu$ l reaction using 1X Tris/ammonium sulfate buffer, 1mM dNTPs, 0.85U of Amplitaq buffer (Life Technologies), 1  $\mu$ l of *SMN* and *CFTR* internal standard (IS) and 2.5, 10.0, 0.5 and 5.6 pM of SMA forward, SMA reverse, *CFTR* forward and *CFTR* reverse primers respectively (61). The reaction was denatured for 5 minutes at 94°C followed by 19 cycles of 1 min at 95°C, 2 min at 55°C and 3 min at 72°C with a final extension of 72°C for 7 minutes. For a subset of samples acquired later in our analysis, copy number was determined using the BioRad ddPCR *SMN1* and *SMN2* Copy Number Determination Kits. For DNA from these samples, restriction digest with *HaeIII* and ddPCR reactions were performed in a single reaction as outlined in Copy Number Determination protocol. RPP30 (known copy number of 2) was used as a reference target to determine *SMN1/2* copy number. At least 3 control samples of known *SMN1/2* copy number were used to confirm ability of the assay to call correct copy number.

### *Electrochemiluminescence assay*

The SMN electrochemiluminescence (ECL) assay was performed as previously described (20). Meso Scale Discovery (MSD) standard plates were coated overnight at 4 °C with a mouse monoclonal anti-SMN antibody (2B1, Enzo Life Sciences) at a concentration of 1  $\mu$ g/ml followed by a 1 hour blocking step with 5% (w/v) bovine serum albumin (BSA) in PBS. Samples were diluted in sample buffer composed of 50 mM Tris-HCl pH 7.5, 500 mM NaCl, 1% (w/v) BSA, 1% (v/v) Triton X-100, 0.05% (w/v) protease inhibitor cocktail (Sigma-Aldrich). A serial dilution of recombinant human SMN (Enzo Life Sciences)

was used to calibrate the assay. Samples and recombinant SMN were incubated for 2 hours at room temperature with shaking at 650 rpm. Primary and secondary antibodies were diluted in antibody dilution buffer composed of 50 mM Tris-HCl pH 7.5, 137.5 mM NaCl, 1%(w/v) BSA, 0.05% (v/v) Tween-20, 0.2% (w/v) mouse gamma globulin fraction (Rockland). Rabbit anti-SMN antibody (Protein Tech) was labeled with 150 nmol SULFO-TAG NHS ester (MSD) and caged ruthenium at a 20:1 challenge ratio following manufacturer's recommendations. SULFO-TAG labeled rabbit anti-SMN antibody (2 µg/ml) was incubated for 1 hour at room temperature followed by incubation with SULFO-TAG anti-rabbit IgG antibody (0.5 µg/ml; MSD) to amplify the signal. Finally, read buffer T (MSD) was added to the wells, and plates were read using a Meso Scale Discovery Imager 6000 instrument (MSD) and MSD software was used to determine SMN protein levels using a 4-parameter logistic fit equation based on the serial dilution of recombinant human SMN. Total soluble protein was determined using the BCA protein assay (ThermoFisher) per manufacturer's recommendations. SMN data were normalized to total soluble protein and expressed as ng SMN per mg total protein (ng/mg).

#### *Western Blot analysis*

SMN western blot analysis was performed as previously described (51). Equal amounts of total soluble protein were denatured at 95 °C for 10 minutes under reducing conditions by the addition of sampling buffer consisting of 250 mM Tris-HCl pH 6.8, 10% (w/v) sodium dodecyl sulfate (SDS), 30% (v/v) glycerol, 5% (v/v) β-mercaptoethanol and 0.02% (w/v) bromophenol blue. Soluble proteins were separated by size on a pre-poured 4-15% (w/v) gradient SDS polyacrylamide gel (BioRad) at a constant potential difference of 200 V for 35 minutes at room temperature. The separated proteins were subsequently transferred onto a polyvinyl difluoride (PVDF) membrane (0.2 µm pore size) (ThermoFisher) for 10 minutes in Tris-glycine transfer buffer (BioRad) using the Trans-Blot Turbo Blotting system (Biorad). Membranes were blocked in Tris-buffered saline, pH 7.4 (TBS) supplemented with 0.1% (v/v) Tween-20 and 5% (w/v) BSA for 1 hour at room temperature. Membranes were incubated overnight at 4 °C with primary antibodies diluted in TBS supplemented with 0.1% (v/v) Tween-20 and 2.5% (w/v) BSA. A mouse anti-SMN antibody (BD Transduction Laboratories, 610646) was used to detect SMN. Mouse anti-GAPDH (ThermoFisher, AM4300) was used as a loading control. Membranes were subsequently incubated for 1 hour at room temperature with a secondary anti-mouse IgG antibody coupled to alkaline phosphatase (Sigma-Aldrich, A3562) diluted 1:5,000 in TBS supplemented with 0.1% (v/v) Tween-20 and 2.5% (w/v) BSA. Finally, membranes were incubated for 1 minute at room temperature with enhanced chemifluorescence (ECF) substrate

(GE Healthcare) and fluorescence was measured using an ImageQuant LAS4000 Imager (GE Healthcare) equipped with a Cy2 filter and a CCD camera. Fluorescence signal intensity was quantified using the gel analysis tool of the Image J (NIH) software package. SMN data were normalized to the average signal intensity of the three loading controls.

**Supplemental Table 1:** Human samples used in study organized by age

| Case ID   | Age (GA weeks/months) | PMI (hours) | SMN1 copy # | SMN2 copy # | Tissue  | Cause of death                  |
|-----------|-----------------------|-------------|-------------|-------------|---------|---------------------------------|
| NBB_1075  | 15w(GA)               | 3           | 1           | 2           | TSC     | Control                         |
| NBB_182   | 16w(GA)               | 1           | 2           | 1           | TSC     | Control                         |
| NBB_308   | 16w(GA)               | 1           | 2           | 1           | I,D     | Control                         |
| NBB_M1190 | 16w(GA)               | 4           | 4           | 0           | C       | Spontaneous Rupture of Membrane |
| NBB_4604  | 17w(GA)               | 1           | 3           | 0           | C       | Control                         |
| NBB_1072  | 18w(GA)               | 1           | 3           | 2           | TSC     | Control                         |
| NBB_1090  | 18w(GA)               | 2           | 3           | 0           | TSC     | Control                         |
| NBB_113   | 18w(GA)               | 1           | 2           | 2           | I,D     | Control                         |
| NBB_1621  | 18w(GA)               | 1           | 2           | 1           | TSC     | Control                         |
| NBB_19    | 18w(GA)               | 10          | 2           | 0           | TSC     | Control                         |
| NBB_278   | 18w(GA)               | 1           | 2           | 1           | I,D     | Control                         |
| NBB_4711  | 18w(GA)               | 1           | 3           | 1           | C       | Control                         |
| NBB_79    | 18w(GA)               | 21          | 2           | 2           | TSC     | Iniencephaly, trisomy 18        |
| SMA_17_06 | 18w(GA)               | 0           | 0           | 3           | SC      | Type I SMA                      |
| NBB_1086  | 19w(GA)               | 1           | 3           | 1           | TSC     | Control                         |
| NBB_1566  | 19w(GA)               | 6           | 3           | 0           | C       | Control                         |
| NBB_1756  | 19w(GA)               | 1           | 1           | 2           | TSC     | Control                         |
| NBB_1879  | 19w(GA)               | 1           | 2           | 2           | TSC,C   | Control                         |
| NBB_205   | 19w(GA)               | 1           | 2           | 1           | I,D     | Control                         |
| NBB_319   | 19w(GA)               | 1           | 3           | 0           | I,D     | Control                         |
| NBB_393   | 19w(GA)               | 14          | 2           | 2           | C       | Control                         |
| NBB_400   | 19w(GA)               | 9           | 2           | 2           | TSC     | Control                         |
| NBB_412   | 19w(GA)               | 1           | 2           | 1           | I,D     | Control                         |
| NBB_46    | 19w(GA)               | 12          | 2           | 2           | TSC     | Control                         |
| NBB_7     | 19w(GA)               | 2           | 3           | 1           | TSC     | Control                         |
| NBB_97    | 19w(GA)               | 1           | 2           | 1           | I,D     | Meningomyelocele                |
| NBB_1876  | 20w(GA)               | 1           | 3           | 1           | TSC     | Control                         |
| NBB_220   | 20w(GA)               | 13          | 2           | 1           | I,D     | Control                         |
| NBB_4311  | 20w(GA)               | 16          | 2           | 2           | C       | Retroplacental hematoma         |
| NBB_126   | 21w(GA)               | 2           | 2           | 2           | I,D     | Turner Syndrome                 |
| NBB_1932  | 21w(GA)               | 20          | 2           | 1           | TSC,C   | Hypoplastic left heart syndrome |
| NBB_218   | 21w(GA)               | 16          | 2           | 0           | I,D     | Trisomy 12                      |
| NBB_314   | 21w(GA)               | 12          | 3           | 1           | I,D     | Trisomy 1                       |
| NBB_67    | 21w(GA)               | 5           | 2           | 1           | I,D     | Anencephaly                     |
| NBB_M1078 | 21w(GA)               | 11          | 2           | 2           | C       | Respiratory Insufficiency       |
| NBB_M1081 | 21w(GA)               | 7           | 2           | 2           | C       | Infection                       |
| NBB_M1102 | 21w(GA)               | 14          | 2           | 2           | C       | Stillborn                       |
| NBB_1089  | 22w(GA)               | 3           | 3           | 3           | TSC     | Trisomy 21                      |
| NBB_262   | 22w(GA)               | 1           | 2           | 1           | TSC     | Control                         |
| NBB_487   | 22w(GA)               | 24          | 2           | 1           | TSC     | Trisomy 21                      |
| NBB_684   | 22w(GA)               | 5           | 2           | 2           | I,D     | Tuberous Sclerosis              |
| NBB_M1085 | 22w(GA)               | 5           | 2           | 2           | C       | Respiratory Insufficiency       |
| NBB_M3575 | 22w(GA)               | 14          | 2           | 2           | C       | Intrauterine Infection          |
| NBB_111   | 23w(GA)               | 18          | 2           | 2           | TSC,I,D | Holoprosencephaly, trisomy 13   |
| NBB_130   | 23w(GA)               | 19          | 2           | 1           | TSC     | Ventriculomegaly, trisomy 13    |

|           |         |    |   |   |                                 |                                       |
|-----------|---------|----|---|---|---------------------------------|---------------------------------------|
| NBB_4320  | 23w(GA) | 9  | 3 | 0 | C                               | Hyaline membrane disease              |
| NBB_908   | 23w(GA) | 3  | 2 | 2 | TSC                             | Diaphragmatic hernia                  |
| NBB_1117  | 24w(GA) | 2  | 2 | 0 | TSC                             | Control                               |
| NBB_311   | 24w(GA) | 1  | 2 | 2 | TSC                             | Control                               |
| NBB_331   | 24w(GA) | 12 | 2 | 1 | I,D                             | Control                               |
| NBB_4310  | 24w(GA) | 10 | 2 | 3 | C                               | Pulmonary hemorrhage                  |
| NBB_447   | 24w(GA) | 3  | 2 | 2 | TSC,C                           | Prematurity                           |
| NBB_4293  | 25w(GA) | 15 | 2 | 2 | TSC                             | Premature (25w), *died at birth       |
| NBB_4313  | 25w(GA) | 8  | 2 | 2 | C                               | Respiratory insufficiency             |
| NBB_4942  | 25w(GA) | 16 | 3 | 2 | C                               | Prematurity                           |
| NBB_475   | 26w(GA) | 7  | 2 | 1 | TSC                             | Orbital encephalocele                 |
| NBB_4283  | 27w(GA) | 19 | 2 | 0 | TSC,C                           | Respiratory insufficiency             |
| NBB_361   | 28w(GA) | 1  | 2 | 1 | TSC,I,D                         | Hydrops fetalis                       |
| NBB_70    | 33w(GA) | 8  | 2 | 2 | TSC                             | Dandy-Walker syndrome, trisomy 22     |
| NBB_245   | 34w(GA) | 2  | 3 | 1 | I,D                             | Trisomy 18                            |
| NBB_5900  | 34w(GA) | 23 | 2 | 2 | C                               | Hypoplastic Left Heart Syndrome       |
| NBB_1057  | 35w(GA) | 1  | 3 | 1 | TSC                             | Control                               |
| CTL_95_04 | 37w(GA) | 8  | 4 | 3 | TSC                             | Congenital heart disease              |
| NBB_637   | 39w(GA) | 2  | 2 | 1 | C                               | Hypoplastic Left Heart                |
| NBB_M2147 | 39w(GA) | 26 | 2 | 2 | C                               | Stillborn                             |
| NBB_780   | 0.00    | 13 | 5 | 0 | TSC                             | Stillborn                             |
| CTL_12_02 | 0.03    | 26 | 2 | 2 | TSC,I,D                         | Unknown                               |
| CTL_96_14 | 0.03    | 5  | 2 | 2 | I                               | Diaphragmatic hernia                  |
| NBB_35    | 0.03    | 22 | 2 | 0 | TSC                             | Control                               |
| NBB_5457  | 0.06    | 25 | 2 | 0 | TSC                             | Cardiac arrhythmia                    |
| NBB_5019  | 0.07    | 6  | 2 | 2 | C                               | Control                               |
| NBB_432   | 0.12    | 2  | 2 | 1 | TSC                             | Hydrops fetalis                       |
| NBB_779   | 0.17    | 5  | 3 | 1 | C                               | Congenital Heart Defect               |
| NBB_M3250 | 0.33    | 10 | 2 | 1 | TSC                             | Prematurity                           |
| NBB_1069  | 0.40    | 2  | 2 | 1 | TSC                             | Malformation of brainstem, cerebellum |
| NBB_M1056 | 0.40    | 17 | 3 | 1 | TSC                             | Prematurity                           |
| SMA_17_03 | 0.50    | 22 | 0 | 2 | LSC,TSC,CSC,I,D,FC,TC,Cb,BS,T,L | Type I SMA                            |
| NBB_398   | 0.53    | 3  | 3 | 1 | C                               | Prematurity                           |
| NBB_106   | 0.70    | 9  | 2 | 1 | TSC,C,D                         | Premature (2 weeks)                   |
| NBB_199   | 0.7     | 15 | 2 | 2 | TSC                             | SIDS                                  |
| NBB_1184  | 1.00    | 26 | 2 | 1 | TSC                             | SIDS                                  |
| NBB_1537  | 1.03    | 9  | 2 | 2 | C                               | Cardiac arrhythmia                    |
| NBB_4353  | 1.13    | 5  | 4 | 1 | CSC,C                           | SIDS                                  |
| NBB_759   | 1.17    | 7  | 2 | 0 | C                               | Idiopathic Pulmonary Hemorrhage       |
| CTL_90_08 | 1.30    | 8  | 2 | 2 | TSC                             | Arthrogryposis                        |
| CTL_10_17 | 1.40    | 15 | 3 | 2 | I,D                             | Unknown                               |
| NBB_167   | 1.50    | 9  | 2 | 1 | TSC,C                           | SIDS                                  |
| NBB_25    | 1.56    | 24 | 2 | 1 | TSC                             | SIDS, premature (1 month)             |
| NBB_5700  | 1.80    | 6  | 3 | 2 | TSC,C                           | SUDEP                                 |
| SMA_11_01 | 1.80    | 7  | 0 | 2 | TSC,I,D                         | Type I SMA                            |
| NBB_657   | 1.86    | 15 | 2 | 2 | TSC                             | SIDS                                  |
| NBB_18    | 1.90    | 20 | 2 | 1 | TSC                             | SIDS                                  |
| NBB_20    | 1.90    | 8  | 3 | 0 | TSC,C                           | SIDS                                  |

|             |       |      |     |     |                           |                                     |
|-------------|-------|------|-----|-----|---------------------------|-------------------------------------|
| NBB_1132    | 2.17  | 9    | 1   | 2   | CSC,C                     | SIDS                                |
| NBB_36      | 2.40  | 10   | 2   | 1   | TSC                       | SIDS, premature (1 month)           |
| SMA_12_01   | 2.50  | 7    | 0   | 2   | TSC,I,D,L                 | Type I SMA                          |
| NBB_4383    | 2.53  | 8    | 2   | 2   | C                         | SIDS                                |
| CTL_02_02   | 3.00  | 15   | 2   | 2   | TSC                       | Nemaline myopathy                   |
| NBB_4       | 3.06  | 14   | 3   | 1   | TSC                       | SIDS                                |
| NBB_1055    | 3.2   | 12   | 2   | 2   | TSC,C                     | Pneumonia                           |
| NBB_647     | 3.20  | 10   | 2   | 1   | C                         | SIDS                                |
| CTL_08_01   | 4.00  | 14.5 | 2   | 2   | TSC                       | Unknown                             |
| SMA_08_01   | 4.00  | 14.5 | 0   | 2   | TSC,I,D                   | Type I SMA                          |
| SMA_09_02   | 4.00  | 4    | 0   | 2   | TSC,I,D                   | Type I SMA                          |
| NBB_569     | 4.40  | 16   | 2   | 1   | I                         | Unknown                             |
| NBB_166     | 4.53  | 11   | 2   | 1   | C                         | Pneumonia                           |
| NBB_193     | 4.63  | 9    | 2   | 2   | TSC                       | SIDS                                |
| NBB_169     | 4.80  | 14   | 3   | 0   | TSC                       | SIDS                                |
| SMA_92_01   | 5.50  | 14   | 0   | 2   | TSC,L                     | Type I SMA                          |
| SMARD_10_18 | 5.50  | 2    | 2   | 1   | I,D                       | SMARD                               |
| NBB_134     | 5.83  | 18   | 3   | 1   | TSC                       | SIDS                                |
| NBB_5947    | 5.97  | 11   | 2   | 1   | CSC,C                     | Asphyxia                            |
| SMA_10_19   | 6.00  | 6    | 0   | 2   | TSC,I,D                   | Type I SMA                          |
| SMA_10_20   | 6.00  | 12   | 0   | 2   | D                         | Type I SMA                          |
| NBB_282     | 6.40  | 11   | 2   | 2   | C                         | SIDS                                |
| NBB_947     | 6.70  | 7    | 2   | 2   | TSC                       | Peters plus syndrome, hydrocephalus |
| SMA_10_14   | 7.00  | 25   | 0   | 2   | LSC,TSC,CSC,D,BS          | Type I SMA                          |
| SMA_99_17   | 8.80  | 11   | 0   | 2   | TSC                       | Type I SMA                          |
| NBB_774     | 9.10  | 10   | 2   | 1   | C                         | SIDS                                |
| NBB_383     | 10.5  | 8    | 3   | 2   | TSC                       | Cerebral palsy                      |
| SMA_07_01   | 11.00 | 24   | 0   | 2   | TSC,I,D                   | Type I SMA                          |
| SMA_94_06   | 12.80 | 10   | 0   | 2   | TSC,L                     | Type I SMA                          |
| CTL_93_07   | 14.00 | 9    | 2   | 1   | TSC                       | Liver disease                       |
| SMA_10_01   | 14.80 | 2    | 0   | 2   | I,D                       | Type I SMA                          |
| CTL_10_16   | 15.00 | 16   | 2   | 1   | I,D                       | Unknown                             |
| SMA_08_02   | 16.00 | 14   | 0   | 2   | LSC,TSC,CSC,I,D           | Type I SMA                          |
| NBB_1425    | 17.13 | 2    | 2   | 2   | TSC                       | Zellweger syndrome                  |
| CTL_12_05   | 19.00 | 24   | 2   | 1   | I,D                       | Unknown                             |
| NBB_103     | 26.50 | 11   | 2   | 1   | TSC                       | Meningitis, seizures                |
| NBB_1864    | 29.97 | 8    | 2   | 2   | C                         | Laryngitis and bronchiolitis        |
| NBB_5282    | 34.16 | 16   | 2   | 2   | TSC                       | Asphyxia                            |
| SMA_10_21   | 35.00 | 10   | 0   | 2   | I,D                       | Type I SMA                          |
| CTL_12_06   | 36.00 | 2    | 2   | 2   | I,D                       | Transverse myelitis                 |
| NBB_1624    | 36.00 | 3    | 2   | 1   | TSC                       | Batten Disease                      |
| SMA_10_12   | 36.00 | 3    | 0   | 2   | I,D                       | Type I SMA                          |
| SMA_14_02   | 42.00 | 7    | 0   | 2   | D                         | Type I SMA                          |
| SMA_14_01   | 48.00 | 23   | N/A | N/A | TSC                       | Type I SMA                          |
| NBB_3       | 64.80 | 17   | 2   | 2   | TSC                       | Cardiac arrest                      |
| NBB_561     | 72.00 | 2    | 2   | 1   | TSC                       | Hurler syndrome                     |
| SMA_10_16   | 72.0  | 24   | 0   | 2   | LSC,TSC,CSC,D,FC,TC,Cb,BS | Type II SMA                         |
| NBB_1181    | 96.00 | 8    | 2   | 1   | TSC                       | Lennox-Gastaut syndrome             |

|              |        |      |     |     |                                 |                                |
|--------------|--------|------|-----|-----|---------------------------------|--------------------------------|
| NBB_24       | 108.00 | 17   | 2   | 1   | TSC                             | Motor vehicle accident         |
| NBB_5173     | 129.40 | 10   | 2   | 2   | C                               | Asthma                         |
| NBB_1144     | 144.00 | 6    | 2   | 1   | TSC                             | Metachromatic leukodystrophy   |
| NBB_1943     | 144.00 | 24   | 2   | 2   | TSC                             | SUDEP                          |
| SMA_10_02    | 144.00 | N/A  | 0   | 2   | TSC                             | Type II SMA                    |
| NBB_5376     | 159.36 | 19   | 2   | 1   | TSC                             | Suicide                        |
| NBB_1670     | 159.4  | 5    | 2   | 1   | C                               | Asphyxia                       |
| CTL_13_01    | 168.00 | 2    | 2   | 1   | TSC,I,D                         | Cardiac arrest                 |
| Rx_SMA_14_05 | 8.00   | 6    | 0   | 2   | LSC,TSC,CSC,I,D,FC,TC,Cb,BS,T,L | Type I SMA   Rx=5d   doses=1   |
| Rx_SMA_17_02 | 12.00  | 22   | 0   | 2   | LSC,TSC,CSC,I,D                 | Type I SMA   Rx=3.5m   doses=4 |
| Rx_SMA_17_04 | 24.00  | 2    | 0   | 2   | LSC,TSC,D                       | Type I SMA   Rx=8m   doses=11  |
| Rx_SMA_17_05 | 48.00  | 2    | 0   | 2   | LSC,TSC,CSC,I,D,FC,TC,L         | Type I SMA   Rx=12m   doses=10 |
| Rx_SMA_18_01 | 162.00 | 48   | 0   | 3   | LSC,TSC,CSC,D,FC,TC,Cb,L        | Type II SMA   Rx=10m   doses=4 |
| Rx_SMA_19_01 | 11.00  | 13.5 | N/A | N/A | LSC,TSC,CSC,I,D,FC,TC,Cb,BS,T,L | Type I SMA   Rx=6m   doses=5   |

GA=gestational age, PMI=post-mortem interval, NBB=NIH NeuroBioBank, CTL=non-SMA control subject, SMA=SMA subject, SC=spinal cord, I=iliopsoas muscle, D=diaphragm muscle, C=cortex, FC=frontal cortex, TC=temporal cortex, Cb=cerebellum, BS=brainstem, T=thalamus, L=liver, Rx=Duration of nusinersen treatment (months), doses=Total number of nusinersen doses, N/A=not available



**Supplemental Table 2:** RT-qPCR Taqman assays and SYBR Green primers used in study

| Gene name      | DNA oligo | Sequence (5' to 3')                     | Type       |
|----------------|-----------|-----------------------------------------|------------|
| <i>SMN1-FL</i> | Forward   | TAT CAT ACT GGC TAT TAT ATG GGT TTC     | Taqman     |
|                | Probe     | AAG GAG AAA TGC TGG CAT AGA GCA GC      |            |
|                | Reverse   | TCG TTT CTT TAG TGG TGT CAT TTA G       |            |
| <i>SMN2-FL</i> | Forward   | TAT CAT ACT GGC TAT TAT ATG GGT TTT     | Taqman     |
|                | Probe     | AAG GAG AAA TGC TGG CAT AGA GCA GC      |            |
|                | Reverse   | TCG TTT CTT TAG TGG TGT CAT TTA G       |            |
| <i>SMN2-Δ7</i> | Forward   | TGG CTA TCA TAC TGG CTA TTA TAT GGA A   | Taqman     |
|                | Probe     | CTG GCA TAG AGC AGC ACT AAA TGA CAC CAC |            |
|                | Reverse   | TCC AGA TCT GTC TGA TCG TTT CTT         |            |
| <i>SMN2-Δ5</i> | Forward   | AGA CTG GGA CCA GGA AAG ATA A           | SYBR Green |
|                | Reverse   | TGC TCT ATG CCA GCA TTT CCA TAT         |            |
| ACTB           | Forward   | GAC GAC ATG GAG AAA ATC TG              | SYBR Green |
|                | Reverse   | ATG ATC TGG GTC ATC TTC TC              |            |
| ATP5B          | Forward   | TAC CAC CAA TTC TAA ATG CC              | SYBR Green |
|                | Reverse   | GTG CTC TCA CCCC AAA TG                 |            |
| B2M            | Forward   | AAG GAC TGG TCT TTC TAT CTC             | SYBR Green |
|                | Reverse   | GAT CCC ACT TAA CTA TCT TGG             |            |
| EIF4A2         | Forward   | AGA GAG ATG TTA TCA TGA GGG             | SYBR Green |
|                | Reverse   | TAA CCA AAG ACA CTT GTT GC              |            |
| FBXO38         | Forward   | AAA GAA GAT GCC AGA TGT TG              | SYBR Green |
|                | Reverse   | AAA TGA GAA GTT TCC ACA CC              |            |
| GAPDH          | Forward   | ACA GTT GCC ATG TAG ACC                 | SYBR Green |
|                | Reverse   | TTT TTG GTT GAG CAC AGG                 |            |
| UBC            | Forward   | CGT CAC TTG ACA ATG CAG                 | SYBR Green |
|                | Reverse   | TGT TTC CAG CAA AGA TCA G               |            |
| YWHAZ          | Forward   | AAC TTG ACA TTG TGG ACA TC              | SYBR Green |
|                | Reverse   | AAA ACT ATT TGT GGG ACA CGC             |            |

**Supplemental Table 3:** Comparisons of SMN Protein and RNA in control and SMA spinal cord samples

| Spinal Cord        | Control vs SMA |              |             |                         | Comparison between age groups |           |      |
|--------------------|----------------|--------------|-------------|-------------------------|-------------------------------|-----------|------|
|                    | Age            | Median (IQR) |             | p-value                 | Comparison                    | p-value   |      |
|                    |                | Control      | SMA         | CTL vs SMA              |                               | Control   | SMA  |
| <b>SMN Protein</b> | Prenatal       | 748          | 198         | N/A                     | Prenatal vs <3 Months         | <0.001*** | N/A  |
|                    |                | (302–1188)   | (N/A)       |                         |                               |           |      |
|                    | <3 Months      | 326          | 53          | 0.02*                   | Prenatal vs 3 Mo–14 Years     | <0.001*** | 0.11 |
|                    |                | (154–437)    | (41–128)    |                         |                               |           |      |
| 3 Mo–14 Yr.        | 115            | 67           | 0.09        | <3 Mo. vs 3 Mo–14 Years | 0.01*                         | 0.56      |      |
|                    | (63–165)       | (63–102)     |             |                         |                               |           |      |
| <b>SMN1-FL</b>     | Prenatal       | 1.55         | 0           | N/A                     | Prenatal vs <3 Months         | 0.53      | N/A  |
|                    |                | (1.0–2.39)   | N/A         |                         |                               |           |      |
|                    | <3 Months      | 1.27         | 0           | N/A                     | Prenatal vs 3 Mo–14 Years     | 0.003**   | N/A  |
|                    |                | (1.15–2.07)  | N/A         |                         |                               |           |      |
| 3 Mo–14 Yr.        | 0.94           | 0.01         | N/A         | <3 Mo. vs 3 Mo–14 Years | 0.02*                         | N/A       |      |
|                    | (0.80–1.44)    | N/A          |             |                         |                               |           |      |
| <b>SMN2-FL</b>     | Prenatal       | 0.59         | 1.44        | N/A                     | Prenatal vs <3 Months         | 0.047*    | N/A  |
|                    |                | (0.39–0.83)  | N/A         |                         |                               |           |      |
|                    | <3 Months      | 0.38         | 0.58        | 0.49                    | Prenatal vs 3 Mo–14 Years     | 0.02*     | 0.11 |
|                    |                | (0.23–0.63)  | (0.32–0.63) |                         |                               |           |      |
| 3 Mo–14 Yr.        | 0.42           | 0.47         | 0.40        | <3 Mo. vs 3 Mo–14 Years | 0.47                          | 0.66      |      |
|                    | (0.34–0.50)    | (0.41–0.56)  |             |                         |                               |           |      |
| <b>SMN-Δ7</b>      | Prenatal       | 0.66         | 0.64        | N/A                     | Prenatal vs <3 Months         | 0.91      | N/A  |
|                    |                | (0.53–0.98)  | N/A         |                         |                               |           |      |
|                    | <3 Months      | 0.69         | 0.65        | 0.60                    | Prenatal vs 3 Mo–14 Years     | 0.05*     | 0.79 |
|                    |                | (0.46–0.82)  | (0.38–0.87) |                         |                               |           |      |
| 3 Mo–14 Yr.        | 0.53           | 0.79         | 0.07        | <3 Mo. vs 3 Mo–14 Years | 0.13                          | 0.35      |      |
|                    | (0.39–0.70)    | (0.49–0.98)  |             |                         |                               |           |      |
| <b>SMN-2FL/Δ7</b>  | Prenatal       | 0.82         | 2.23        | N/A                     | Prenatal vs <3 Months         | 0.01*     | N/A  |
|                    |                | (0.70–1.01)  | N/A         |                         |                               |           |      |
|                    | <3 Months      | 0.64         | 0.67        | 0.60                    | Prenatal vs 3 Mo–14 Years     | 0.74      | 0.11 |
|                    |                | (0.41–0.74)  | (0.49–1.79) |                         |                               |           |      |
| 3 Mo–14 Yr.        | 0.84           | 0.65         | 0.07        | <3 Mo. vs 3 Mo–14 Years | 0.09                          | 0.47      |      |
|                    | (0.60–1.02)    | (0.41–1.03)  |             |                         |                               |           |      |

Median and inter-quartile range (IQR) of SMN protein and RNA levels in human thoracic spinal cord. P-values of pairwise comparison of medians between 1) control and SMA, or 2) age groups were calculated using a Wilcoxon Rank-sum test. Prenatal SMA group excluded in all statistical analyses. \*p <0.05, \*\*p <0.01, \*\*\*p <0.001, and represent statistics before multiple comparisons. N/A=not applicable.

**Supplemental Table 4:** Comparisons of SMN Protein and RNA in control cortex samples

| Cortex      | Comparison between age groups |                         |                           |                       |
|-------------|-------------------------------|-------------------------|---------------------------|-----------------------|
|             | Age                           | Median (IQR)            | Comparison                | p-value               |
|             |                               | Control                 |                           | Control               |
| SMN Protein | Prenatal                      | 638                     | Prenatal vs <3 Months     | 0.02*                 |
|             |                               | (233–865)               |                           |                       |
|             | <3 Months                     | 240<br>(165–427)        | Prenatal vs 3 Mo–14 Years | <0.001***             |
| 3 Mo–14 Yr. | 148<br>(85–233)               | <3 Mo. vs 3 Mo–14 Years | 0.06                      |                       |
|             | SMN1-FL                       | Prenatal                | 1.93<br>(1.53–2.80)       | Prenatal vs <3 Months |
| <3 Months   |                               | 1.6<br>(1.17–2.05)      | Prenatal vs 3 Mo–14 Years | <0.001***             |
| 3 Mo–14 Yr. |                               | 0.97<br>(0.85–1.27)     | <3 Mo. vs 3 Mo–14 Years   | 0.03*                 |
| SMN2-FL     | Prenatal                      | 0.73                    | Prenatal vs <3 Months     | 0.02*                 |
|             |                               | (0.53–0.87)             |                           |                       |
|             | <3 Months                     | 0.28<br>(0.23–0.51)     | Prenatal vs 3 Mo–14 Years | 0.01*                 |
| 3 Mo–14 Yr. | 0.29<br>(0.21–0.43)           | <3 Mo. vs 3 Mo–14 Years | 0.62                      |                       |
| SMN-Δ7      | Prenatal                      | 0.63                    | Prenatal vs <3 Months     | 0.08                  |
|             |                               | (0.43–0.86)             |                           |                       |
|             | <3 Months                     | 0.44<br>(0.28–0.67)     | Prenatal vs 3 Mo–14 Years | 0.3                   |
| 3 Mo–14 Yr. | 0.49<br>(0.30–0.69)           | <3 Mo. vs 3 Mo–14 Years | 0.81                      |                       |
| SMN-2FL/Δ7  | Prenatal                      | 1.33                    | Prenatal vs <3 Months     | 0.08                  |
|             |                               | (0.75–1.57)             |                           |                       |
|             | <3 Months                     | 0.91<br>(0.47–1.01)     | Prenatal vs 3 Mo–14 Years | 0.04*                 |
| 3 Mo–14 Yr. | 0.85<br>(0.47–0.88)           | <3 Mo. vs 3 Mo–14 Years | 0.57                      |                       |

Median and inter-quartile range (IQR) of SMN protein and RNA levels in human cortex. P-values of pairwise comparison of medians between age groups were calculated using a Wilcoxon Rank-sum test. \*p <0.05, \*\*\*p <0.001, and represent statistics before multiple comparisons. N/A=not applicable

**Supplemental Table 5:** Comparisons of SMN Protein and RNA in all tissues

|             |                   | Median (IQR)            |                        |                       | p-value                               |                                    |
|-------------|-------------------|-------------------------|------------------------|-----------------------|---------------------------------------|------------------------------------|
|             |                   | Prenatal Control        | Postnatal Control      | Postnatal SMA         | Prenatal Control vs Postnatal Control | Postnatal Control vs Postnatal SMA |
| Spinal Cord | SMN Protein       | 740<br>(305.7–1170.2)   | 156<br>(79–341.9)      | 66<br>(53–107)        | <0.001***                             | <0.001***                          |
|             | <i>SMN-1FL</i>    | 1.56<br>(1.0–2.30)      | 1.16<br>(0.88–1.52)    | 0.01<br>(0–0.01)      | 0.01*                                 | <0.001***                          |
|             | <i>SMN-2FL</i>    | 0.59<br>(0.39–0.83)     | 0.42<br>(0.31–0.54)    | 0.48<br>(0.41–0.59)   | 0.01*                                 | 0.27                               |
|             | <i>SMN2-Δ7</i>    | 0.66<br>(0.53–0.98)     | 0.66<br>(0.41–0.82)    | 0.69<br>(0.43–0.93)   | 0.18                                  | 0.28                               |
|             | <i>SMN2-FL/Δ7</i> | 0.82<br>(0.70–1.01)     | 0.74<br>(0.49–0.94)    | 0.67<br>(0.45–1.11)   | 0.12                                  | 0.82                               |
|             |                   |                         |                        |                       |                                       |                                    |
| Diaphragm   | SMN Protein       | 460.7<br>(373.5–555.0)  | 282.3<br>(245.1–392)   | 112.6<br>(86.8–133.5) | 0.02*                                 | 0.01*                              |
|             | <i>SMN-1FL</i>    | 3.92<br>(3.09–5.14)     | 2.37<br>(1.98–3.16)    | 0<br>N/A              | 0.08                                  | <0.001***                          |
|             | <i>SMN-2FL</i>    | 0.66<br>(0.56–0.74)     | 0.5<br>(0.30–0.69)     | 0.71<br>(0.62–0.82)   | 0.15                                  | 0.08                               |
|             | <i>SMN2-Δ7</i>    | 0.82<br>(0.74–1.0)      | 0.7<br>(0.54–0.98)     | 0.79<br>(0.56–1.03)   | 0.12                                  | 0.78                               |
|             | <i>SMN2-FL/Δ7</i> | 0.7<br>(0.55–0.90)      | 0.57<br>(0.46–1.28)    | 1.11<br>(0.64–1.29)   | 0.74                                  | 0.16                               |
|             |                   |                         |                        |                       |                                       |                                    |
| Iliopsoas   | SMN Protein       | 882.1<br>(701.1–1241.2) | 261.7<br>(174.4–401.9) | 136<br>(94.2–191.7)   | <0.001***                             | 0.05*                              |
|             | <i>SMN-1FL</i>    | 3.32<br>(2.78–4.52)     | 2.83<br>(2.23–3.38)    | 0<br>N/A              | 0.21                                  | <0.001***                          |
|             | <i>SMN-2FL</i>    | 0.33<br>(0.28–0.57)     | 0.34<br>(0.32–0.40)    | 0.49<br>(0.38–0.61)   | 0.94                                  | 0.02*                              |
|             | <i>SMN2-Δ7</i>    | 0.68<br>(0.40–1.10)     | 0.53<br>(0.42–0.87)    | 0.84<br>(0.77–1.04)   | 0.43                                  | 0.045*                             |
|             | <i>SMN2-FL/Δ7</i> | 0.54<br>(0.39–0.78)     | 0.71<br>(0.38–1.17)    | 0.73<br>(0.37–0.76)   | 0.29                                  | 0.62                               |
|             |                   |                         |                        |                       |                                       |                                    |
| Cortex      | SMN Protein       | 638<br>(233–865)        | 213<br>(133–321)       | N/A<br>N/A            | <0.001***                             | N/A                                |
|             | <i>SMN-1FL</i>    | 1.93<br>(1.53–2.80)     | 1.23<br>(0.97–1.63)    | N/A<br>N/A            | 0.002**                               | N/A                                |
|             | <i>SMN-2FL</i>    | 0.73<br>(0.53–0.87)     | 0.29<br>(0.22–0.43)    | N/A<br>N/A            | 0.004**                               | N/A                                |
|             | <i>SMN2-Δ7</i>    | 0.63<br>(0.43–0.86)     | 0.49<br>(0.28–0.69)    | N/A<br>N/A            | 0.09                                  | N/A                                |
|             | <i>SMN2-FL/Δ7</i> | 1.33<br>(0.75–1.57)     | 0.84<br>(0.47–1.0)     | N/A<br>N/A            | 0.02*                                 | N/A                                |
|             |                   |                         |                        |                       |                                       |                                    |

Median and inter-quartile range (IQR) of SMN protein and RNA levels in human spinal cord, diaphragm, iliopsoas, and cortex. P-values of pairwise comparison of medians between 1) prenatal and postnatal control, and 2) control and SMA were calculated using a Wilcoxon Rank-sum test. \* p <0.05, \*\* p <0.05, \*\*\* p <0.001, N/A=not applicable

**Supplemental Table 6:** Cross-tissue comparisons of SMN Protein and RNA

|                          |                   | p-value   |             |              |              |               |                 |
|--------------------------|-------------------|-----------|-------------|--------------|--------------|---------------|-----------------|
|                          |                   | SC vs Dia | SC vs Iliop | SC vs Cortex | Dia vs Iliop | Dia vs Cortex | Iliop vs Cortex |
| <b>Prenatal control</b>  | SMN Protein       | 0.09      | 0.4         | 0.16         | 0.003**      | 0.57          | 0.02*           |
|                          | <i>SMN1-FL</i>    | <0.001*** | <0.001***   | 0.05*        | 0.39         | <0.001***     | <0.001***       |
|                          | <i>SMN2-FL</i>    | 0.34      | 0.02*       | 0.54         | 0.004**      | 0.82          | 0.06            |
|                          | <i>SMN2-Δ7</i>    | 0.047*    | 0.87        | 0.33         | 0.2          | 0.02*         | 0.77            |
|                          | <i>SMN2-FL/Δ7</i> | 0.05*     | 0.004**     | 0.03*        | 0.12         | 0.02*         | 0.01*           |
| <b>Postnatal control</b> | SMN Protein       | 0.29      | 0.29        | 0.53         | 0.86         | 0.29          | 0.40            |
|                          | <i>SMN1-FL</i>    | <0.001*** | <0.001***   | 0.45         | 0.64         | 0.002**       | <0.001***       |
|                          | <i>SMN2-FL</i>    | 0.46      | 0.19        | 0.04*        | 0.19         | 0.06          | 0.51            |
|                          | <i>SMN2-Δ7</i>    | 0.29      | 0.63        | 0.03*        | 0.24         | 0.048*        | 0.40            |
|                          | <i>SMN2-FL/Δ7</i> | 0.91      | 0.78        | 0.68         | 0.91         | 0.85          | 0.88            |
| <b>Postnatal SMA</b>     | SMN Protein       | 0.06      | 0.006**     | N/A          | 0.15         | N/A           | N/A             |
|                          | <i>SMN1-FL</i>    | N/A       | N/A         | N/A          | N/A          | N/A           | N/A             |
|                          | <i>SMN2-FL</i>    | 0.002**   | 0.76        | N/A          | 0.01*        | N/A           | N/A             |
|                          | <i>SMN2-Δ7</i>    | 0.46      | 0.20        | N/A          | 0.41         | N/A           | N/A             |
|                          | <i>SMN2-FL/Δ7</i> | 0.13      | 0.32        | N/A          | 0.047*       | N/A           | N/A             |

P-values of pairwise comparisons of SMN protein and RNA levels between indicated tissues were calculated using a Wilcoxon Rank-sum test. \*p <0.05, \*\*p <0.05, \*\*\*p <0.001. SC=spinal cord, Dia=diaphragm, Iliop=iliopsoas, N/A=not applicable

**Supplemental Table 7:** ASO concentration following nusinersen treatment

| Tissue                 | Observed nusinersen concentration ( $\mu\text{g/g}$ ) |           |           |           |           |           |           |
|------------------------|-------------------------------------------------------|-----------|-----------|-----------|-----------|-----------|-----------|
|                        | SMA_10_16                                             | SMA_14_05 | SMA_17_02 | SMA_17_04 | SMA_17_05 | SMA_18_01 | SMA_19_01 |
| <b>Frontal Cortex</b>  | 0.00                                                  | 1.54      | N/A       | N/A       | 0.69      | 1.06      | 16.38     |
| <b>Temporal Cortex</b> | N/A                                                   | 0.70      | N/A       | N/A       | 0.05      | 8.22      | 11.3      |
| <b>Cerebellum</b>      | 0.00                                                  | 0.77      | N/A       | N/A       | N/A       | 6.41      | 8.91      |
| <b>Thalamus</b>        | N/A                                                   | 0.73      | N/A       | N/A       | N/A       | N/A       | 6.14      |
| <b>Brainstem</b>       | 0.00                                                  | 1.48      | N/A       | N/A       | N/A       | N/A       | 11.16     |
| <b>Cervical SC</b>     | 0.00                                                  | 3.58      | 8.97      | N/A       | 7.62      | 11.68     | 31.57     |
| <b>Thoracic SC</b>     | 0.00                                                  | 6.96      | 27.69     | 20.26     | 7.46      | N/A       | 32.43     |
| <b>Lumbar SC</b>       | 0.00                                                  | 6.74      | 26.50     | 24.18     | 20.88     | 14.15     | 38.26     |

ASO concentration measured in tissues from treated SMA patients. SMA\_10\_16 is an untreated SMA control. SC=spinal cord, N/A=Not available

# Full unedited gel for Figure 2G

SMN

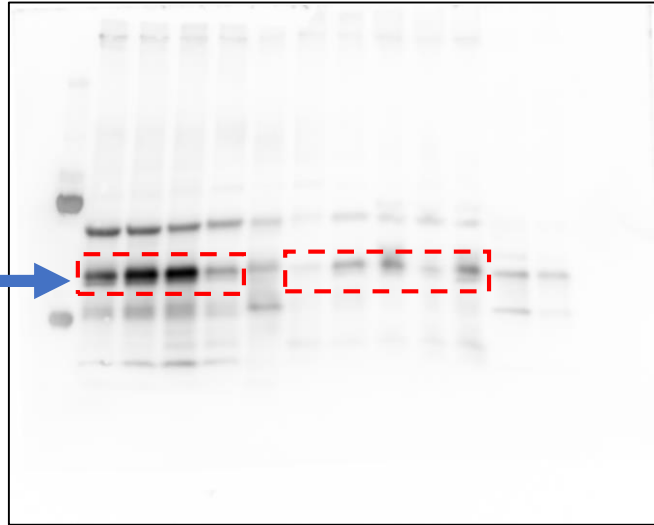

Quantified band

GAPDH

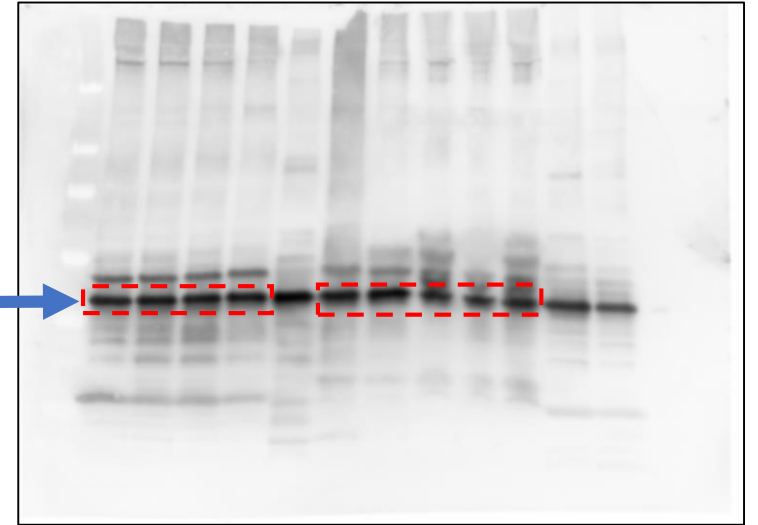

Quantified band

 Lanes used in study
